# Supplementary material
Source: Springer Nature journal article supplement (https://www.springermedizin.de/resource/supplementary/12939_2012_364_MOESM1_ESM.pdf/9550982)

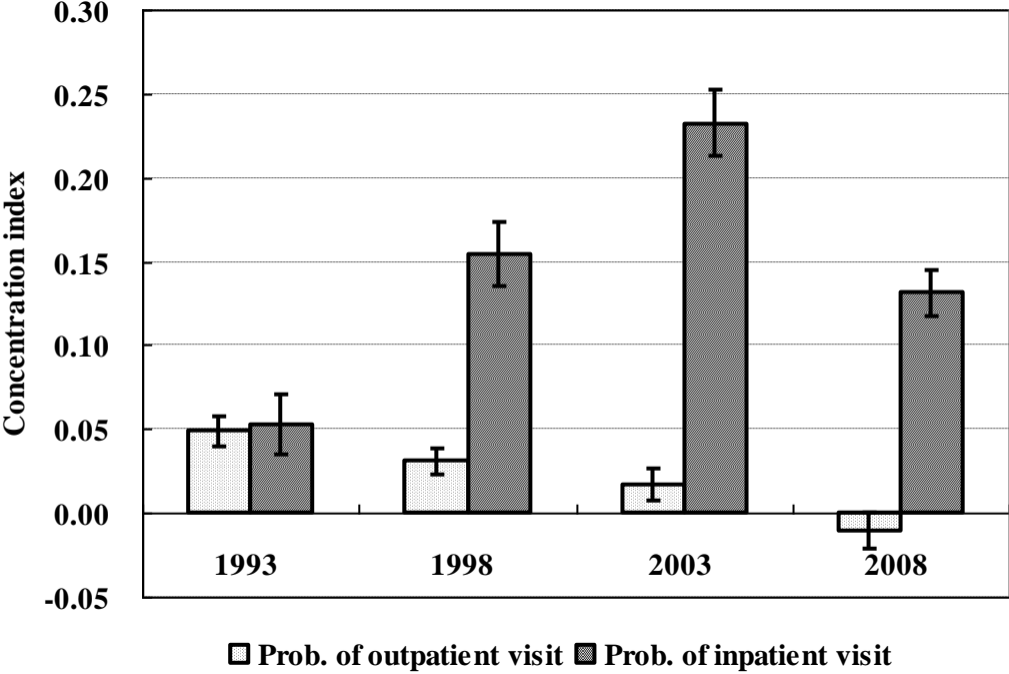

Supplement: MOESM1 [file 9550982]
